# Supplementary material for: “Not quenched” aggregates of a triphenylene derivative for the sensitive detection of trinitrotoluene in aqueous medium
Source: Royal Society of Chemistry journal article supplement (doi:10.1039/c5nj03093e), 2016-01-01
Supplement: c5nj03093e1.pdf [file c5nj03093e1.pdf]

**Electronic Supplementary Information**

“Not Quenched” Aggregates of Triphenylene Derivative for the Sensitive  
Detection of Trinitrotoluene in Aqueous Medium

**Harshveer Arora, Subhamay Pramanik and Manoj Kumar, Vandana Bhalla\***

*Department of Chemistry, UGC Sponsored Centre for Advanced Studies-II,*

*Guru Nanak Dev University, Amritsar-143005, Punjab, India.*

E-mail: [vanmanan@yahoo.co.in](mailto:vanmanan@yahoo.co.in)

**Page Contents**

- S3** DLS measurements of derivative **4** in (i) H<sub>2</sub>O:THF (3:7), (ii) H<sub>2</sub>O:THF (1:1) mixture.
- S4** DLS measurements of derivative **4** in (i) H<sub>2</sub>O:THF (7:3), (ii) H<sub>2</sub>O:THF (9:1) mixture.
- S5** Plot for detection limit of derivative **4** in H<sub>2</sub>O:THF (9:1) mixture with TNT.
- S6** UV-vis spectrum of derivative **4** with TNT and Spectral overlap with TNT and )  
Fluorescence spectrum of derivative **4** (10 μM) upon the addition of 2,4,6-trinitrotoluene (TNT) from 1 to 1.6 μM in H<sub>2</sub>O:DMSO (9:1) mixture.
- S7** <sup>1</sup>H NMR of derivative **4** upon the addition of TNT and Cyclic Voltammogram of derivative **4**.
- S8** Fluorescence spectrum of derivative **4** with TNT in pure THF and Schematic representation of fluorescent quenching with TNT.
- S9** Vapour phase detection of TNT with aggregates of derivative **4**.

**S10**  $^1\text{H}$  NMR of derivative **4**.

**S11**  $^{13}\text{C}$  NMR of derivative **4**.

**S12** MALDI-TOF mass spectrum of derivative **4**.

**S13** FT-IR spectrum of derivative **4**.

**S14** Table of comparison of present manuscript with the literature reports.

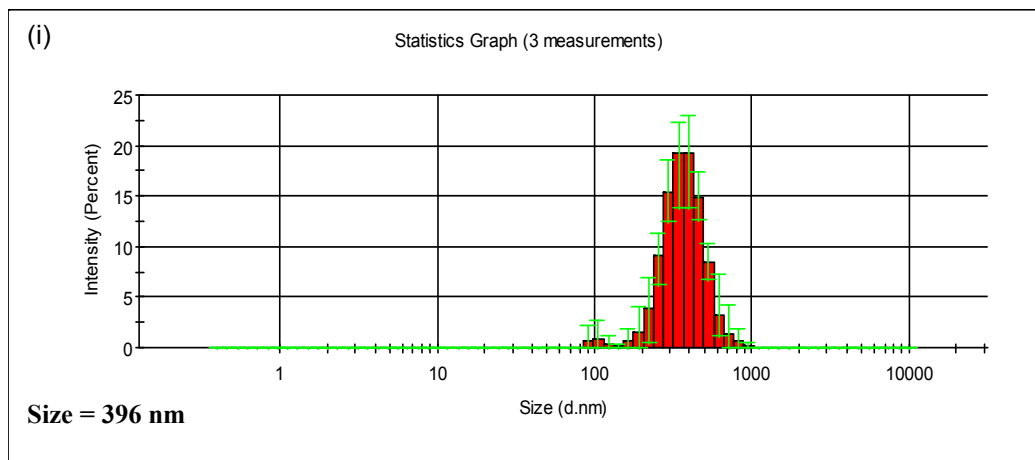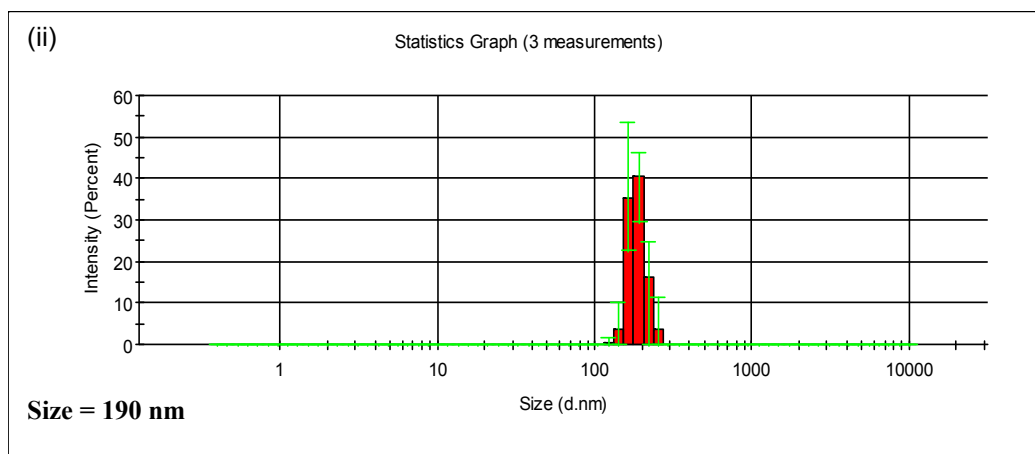

**Fig. S1** Dynamic light scattering (DLS) results showing the variation of particle size (diameter) of derivative **4** in (i) H<sub>2</sub>O:THF (3:7), (ii) H<sub>2</sub>O:THF (1:1) mixture respectively.

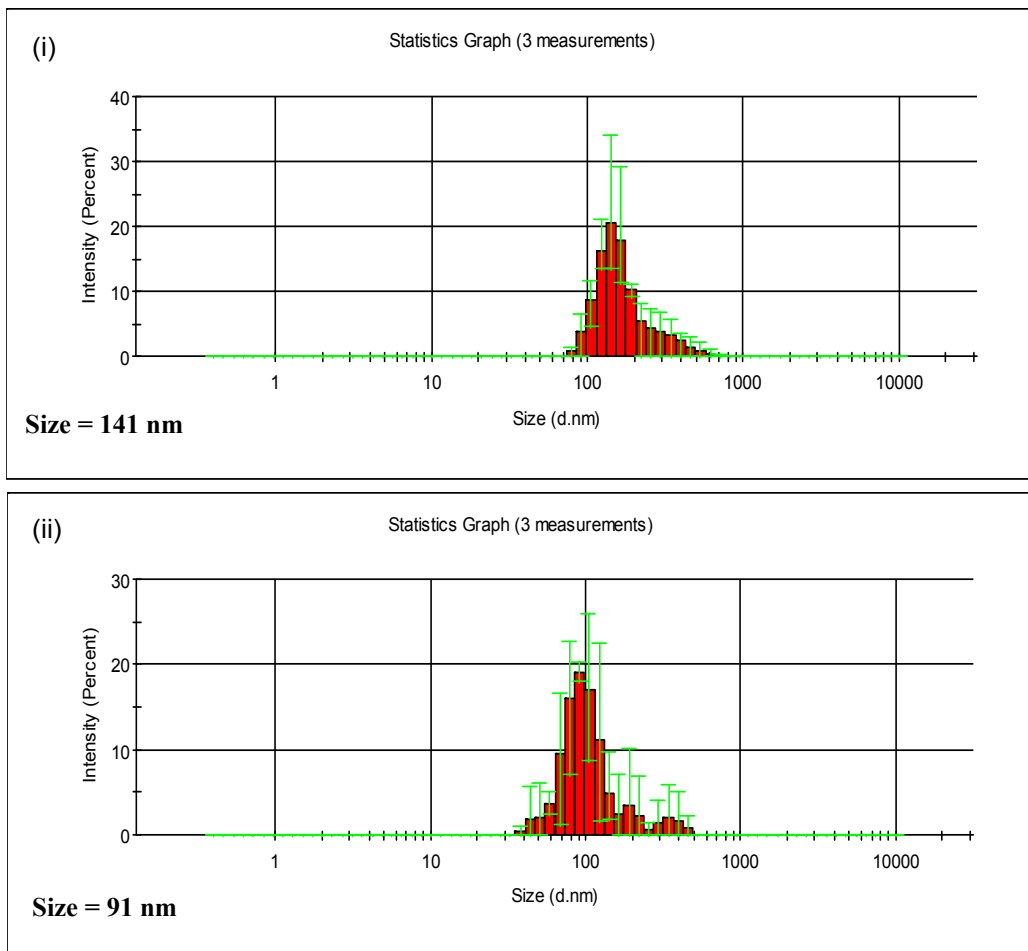

**Fig. S2** Dynamic light scattering (DLS) results showing the variation of particle size (diameter) of derivative 4 in (i) H<sub>2</sub>O :THF (7:3) and (ii) H<sub>2</sub>O :THF (9:1) mixture respectively.

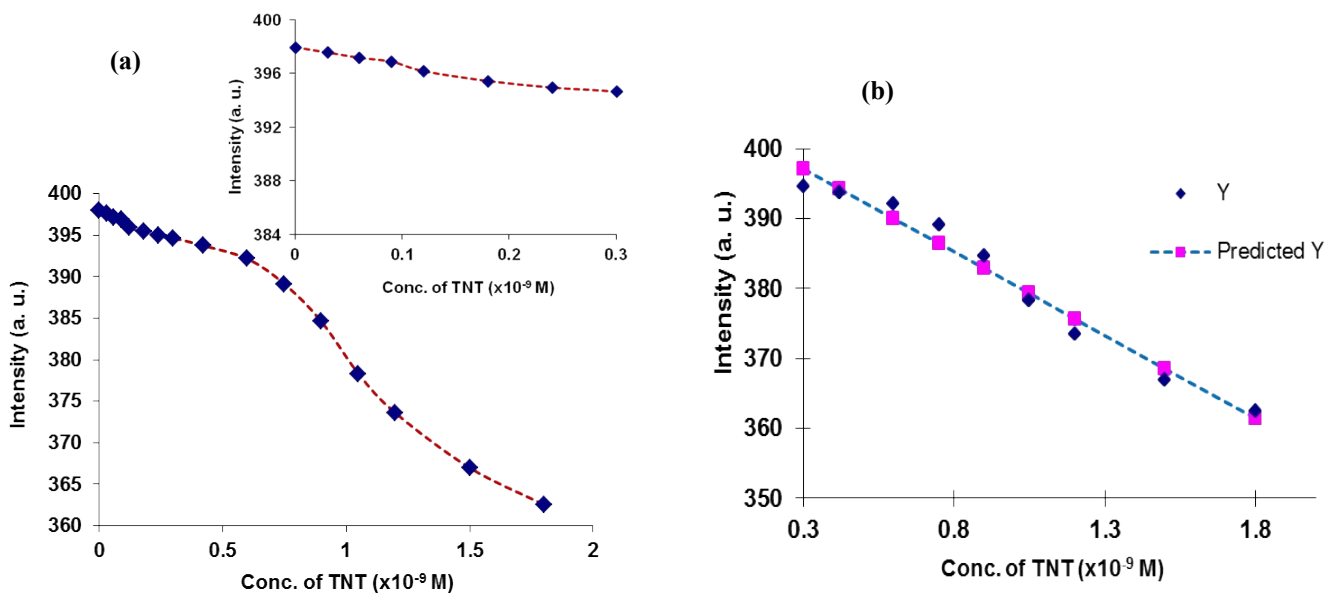

**Fig. S3** (a) Showing the fluorescence intensity of compound **4**, inset showing the linear plot at lower concentration  $0-0.3 \times 10^{-9}$  M and (b) Calibrated curve showing the fluorescence intensity of compound **4** at 417 nm as a function of TNT concentration in  $\text{H}_2\text{O}/\text{THF}$  (9:1, v/v) buffered with HEPES, pH = 7.05,  $\lambda_{\text{ex}} = 319$  nm.

**Multiple R = 0.9864,**

**$R^2 = 0.9731,$**

**Standard deviation = 0.008,**

**Observation = 10,**

**Intercept = 404.305,**

**Slope =  $23.83 \times 10^9$**

**Multiple R = 0.9864,**

**$R^2 = 0.9731,$**

**Standard deviation = 0.0084,**

**Observation = 10,**

**Intercept = 404.305,**

**Slope =  $23.83 \times 10^9$**

The detection limit was calculated based on the fluorescence titration. To determine the S/N ratio, the emission intensity of receptor **4** without TNT was measured by 10 times and the standard deviation of blank measurements was determined. The detection limit is then calculated with the following equation:

$$DL = 3 \times SD/S$$

Where SD is the standard deviation of the blank solution measured by 10 times; S is the slope of the calibration curve.

**From the graph we get slope**

**$S = 23.83 \times 10^9$ , and SD value is 0.008**

Thus using the formula we get the Detection Limit (DL) =  $3 \times 0.008 / 23.83 \times 10^9 = 1.007 \times 10^{-12}$  mol/L = **1.007 pM** =  $228.59 \times 10^{-12}$  g/L = **228.59 pg/L = 228.6 ppq**

*i.e.*, probe **4** can detect TNT in this minimum concentration through fluorescence method.

The detection limit was calculated based on the fluorescence titration. To determine the S/N ratio, the emission intensity of 10 separate solution of receptor **4** without TNT was measured by 10 times and the standard deviation of blank measurements was determined to 0.0084. The detection limit is then calculated with the following equation:

$$DL = 3 \times SD/S$$

Where SD is the standard deviation of 10 separate blank solution measured by 10 times; S is the slope of the calibration curve.

**From the graph we get slope**

**$S = 23.83 \times 10^9$ , and SD value is 0.0084**

Thus using the formula we get the Detection Limit (DL) =  $3 \times 0.0084 / 23.83 \times 10^9 = 1.057 \times 10^{-12}$  mol/L = **1.057 pM** =  $240 \times 10^{-12}$  g/L = **240 pg/L = 240 ppq**.

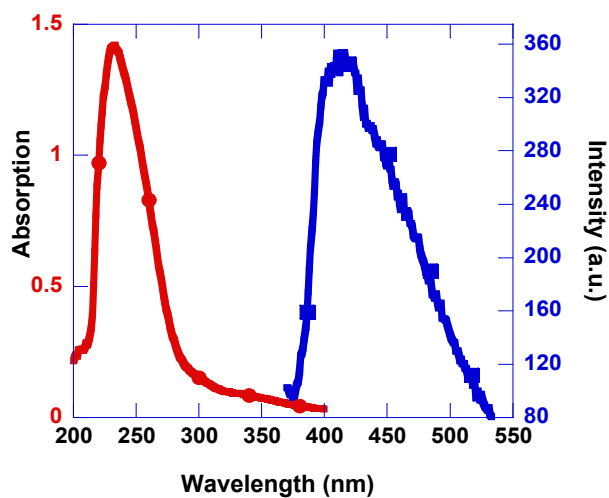

**Fig. S4** Spectral overlap of absorption spectrum of 2,4,6-Trinitrotoluene (red line) and emission spectrum (blue line) of derivative 4

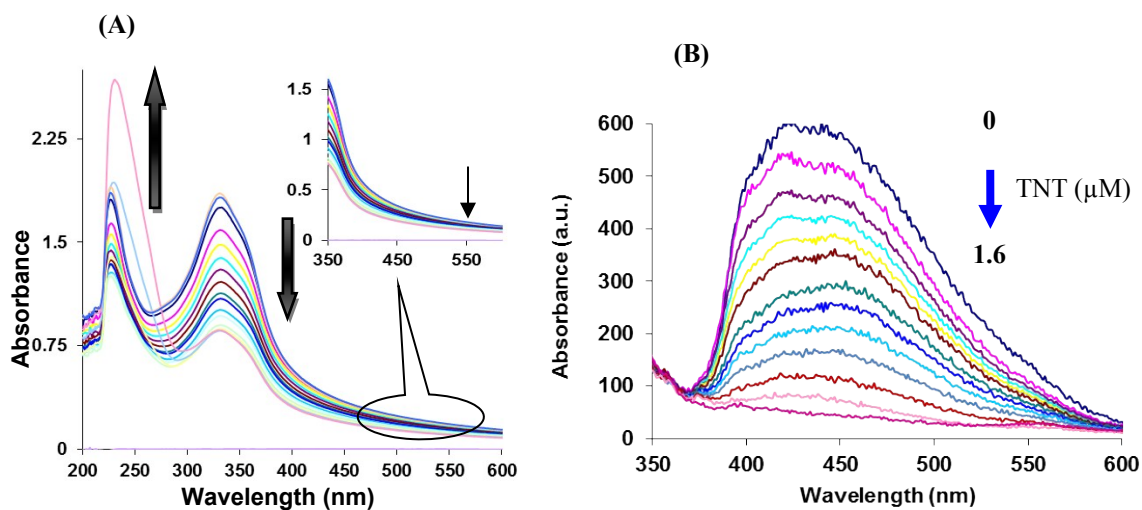

**Fig. S5** (A) UV-Vis spectrum of derivative 4 (10 μM) upon the addition of 15 μM of TNT. Inset shows the trail in the absorption spectrum; (B) Fluorescence spectrum of derivative 4 (10 μM) upon the addition of 2,4,6-trinitrotoluene (TNT) from 1 to 1.6 μM in H<sub>2</sub>O:DMSO (9:1) mixture.

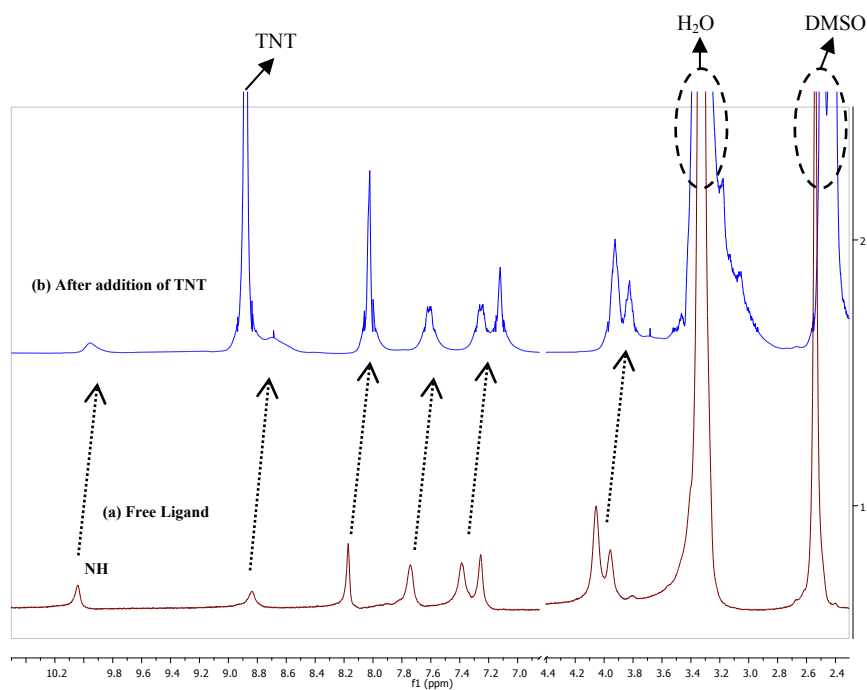

**Fig. S6** Partial <sup>1</sup>H NMR of derivative **4** (600 μl of 10<sup>-2</sup> M) (a) before and (b) after the addition of TNT (10 μl of 10<sup>-2</sup> M) in DMSO-d<sub>6</sub>:D<sub>2</sub>O (8:2).

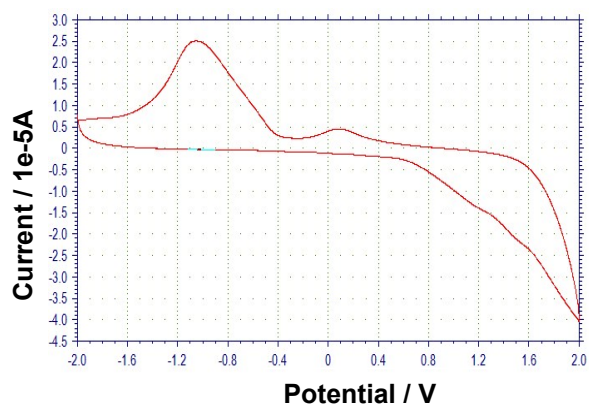

**Fig. S7** Cyclic Voltammogram of derivative **4** (1×10<sup>-3</sup> M) in dichloromethane.

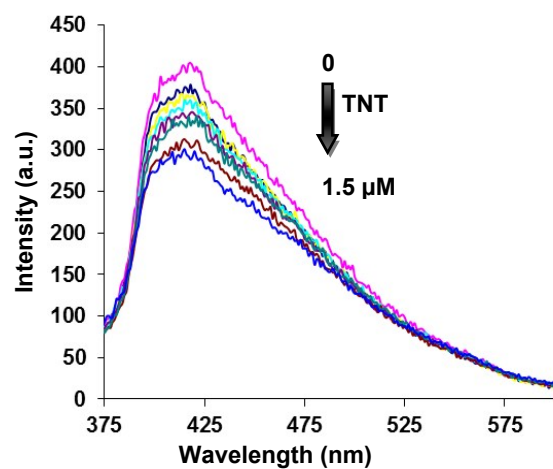

**Fig. S8** Fluorescence emission spectrum of derivative 4 (10  $\mu\text{M}$ ) upon the addition of 1.5  $\mu\text{M}$  of TNT in pure THF.

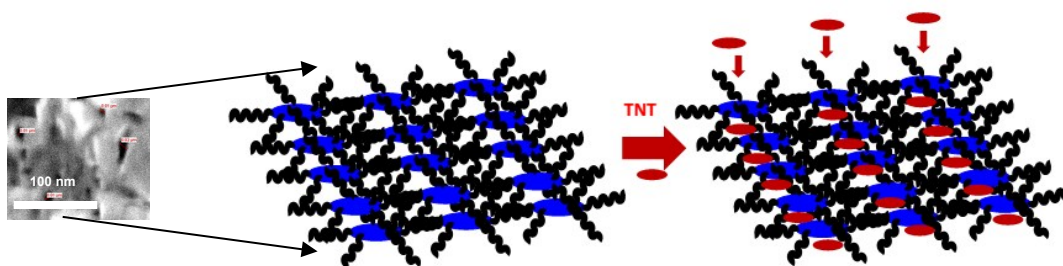

**Fig. S9** Schematic representation of sensing of TNT by aggregates of derivative 4



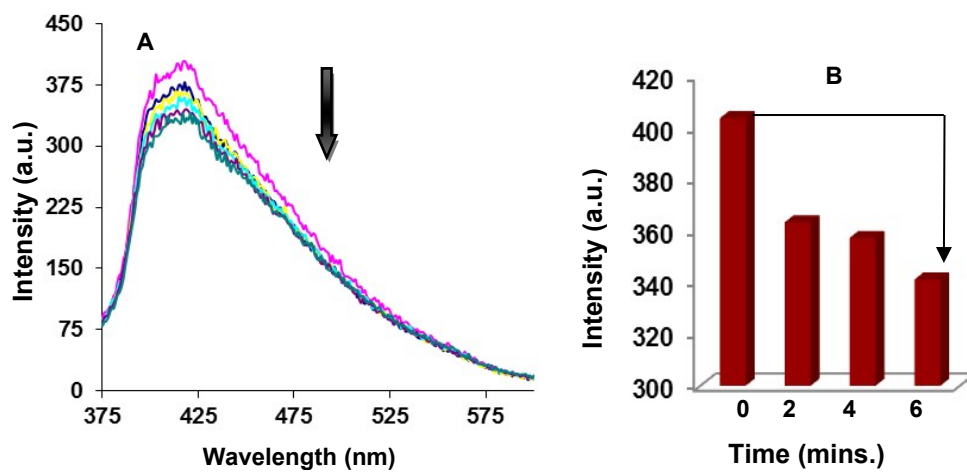

**Fig. S10** (A) Fluorescence emission spectrum of derivative 4 (10 μM) in H<sub>2</sub>O:THF (9:1) upon exposing it to vapors of 2,4,6-trinitrotoluene (B) Bar diagram showing the change in emission intensity of derivative 7 with time upon exposure to the vapours of TNT.

Fig. S11  $^1\text{H}$  NMR of derivative 4 in  $\text{CDCl}_3$

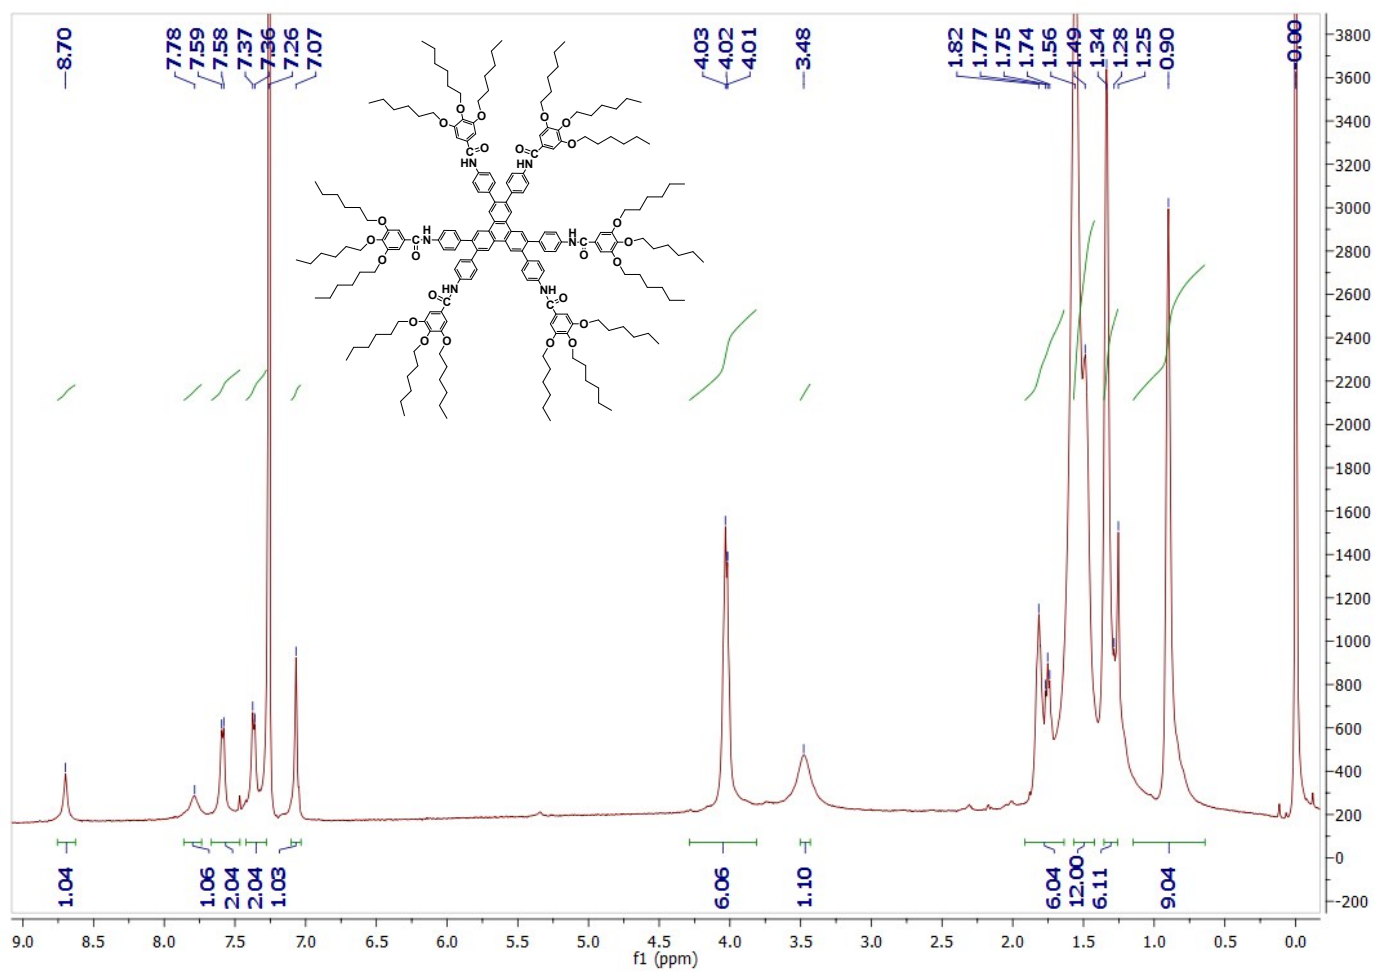

Fig. S12  $^{13}\text{C}$  NMR of derivative 4

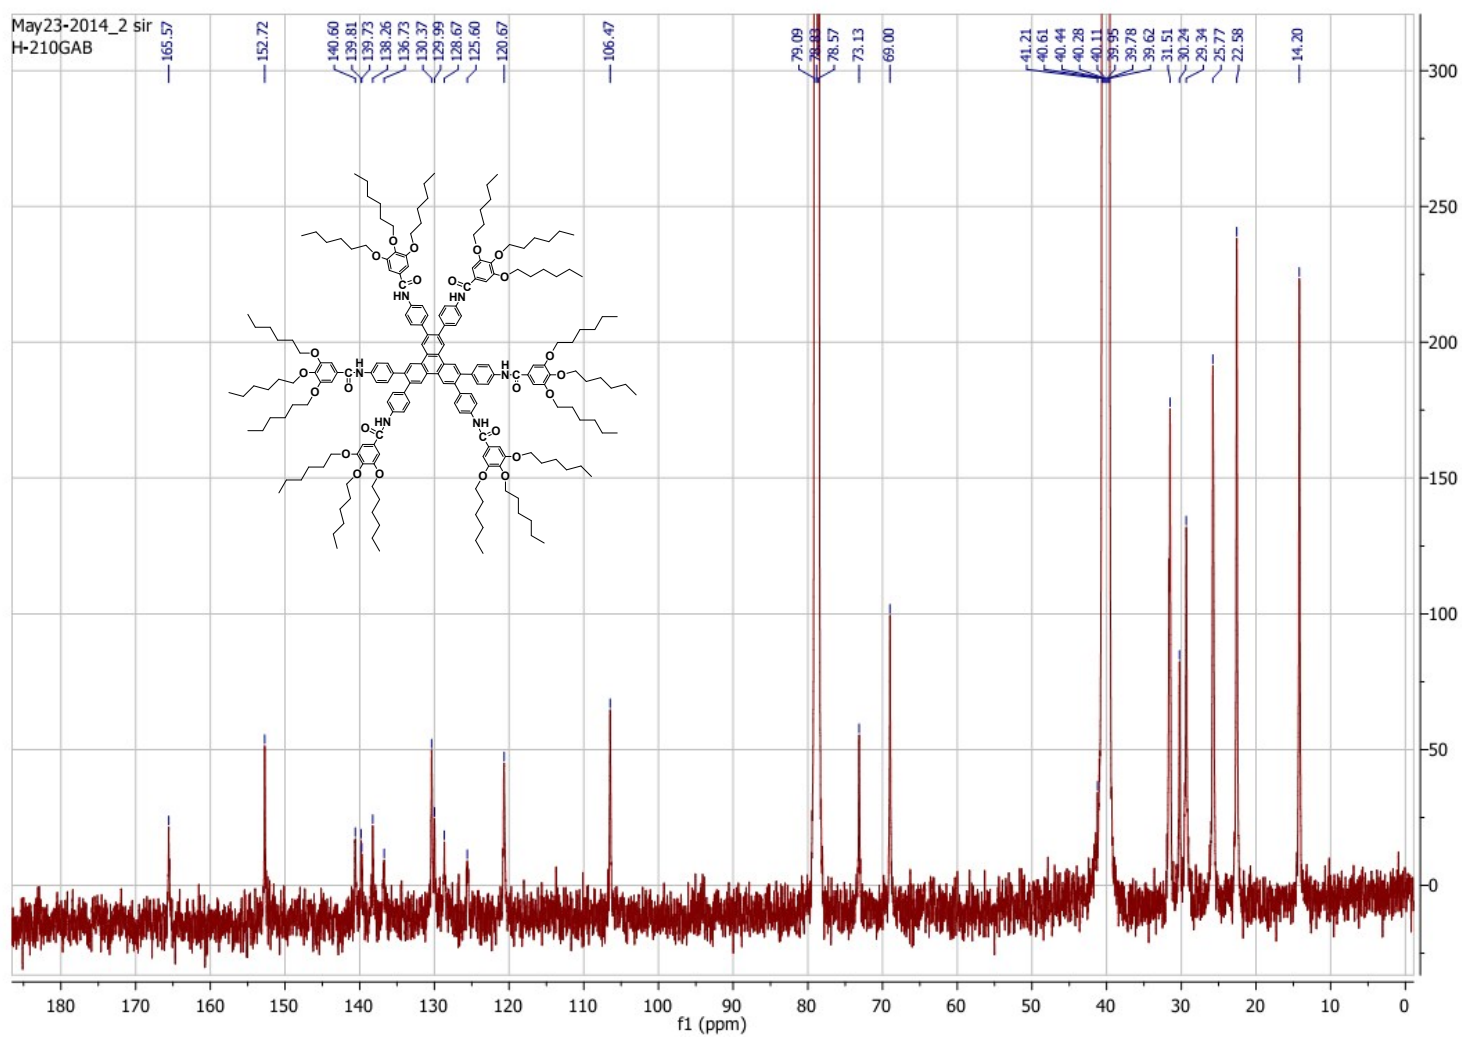

Fig. S13 MALDI-TOF mass spectrum of derivative 4

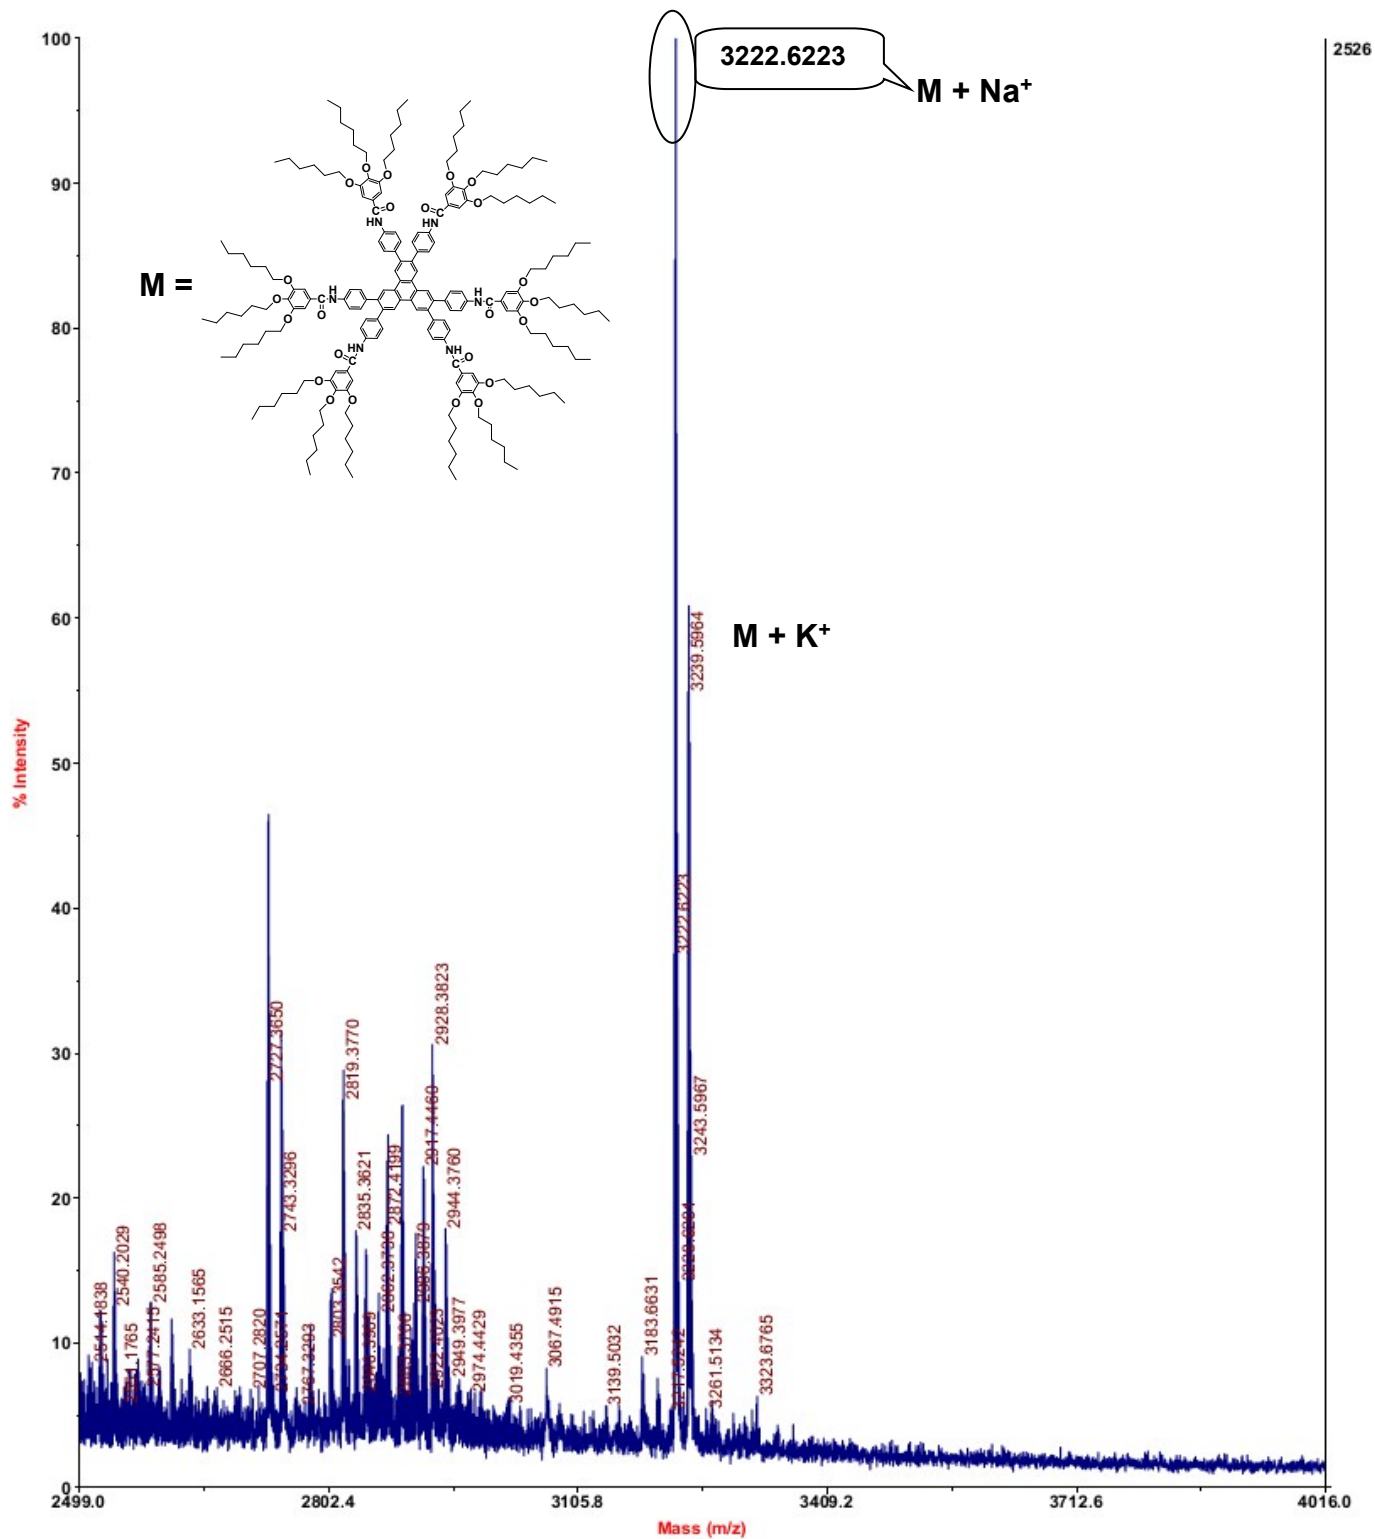

**Fig. S14** FT-IR spectrum of derivative 4

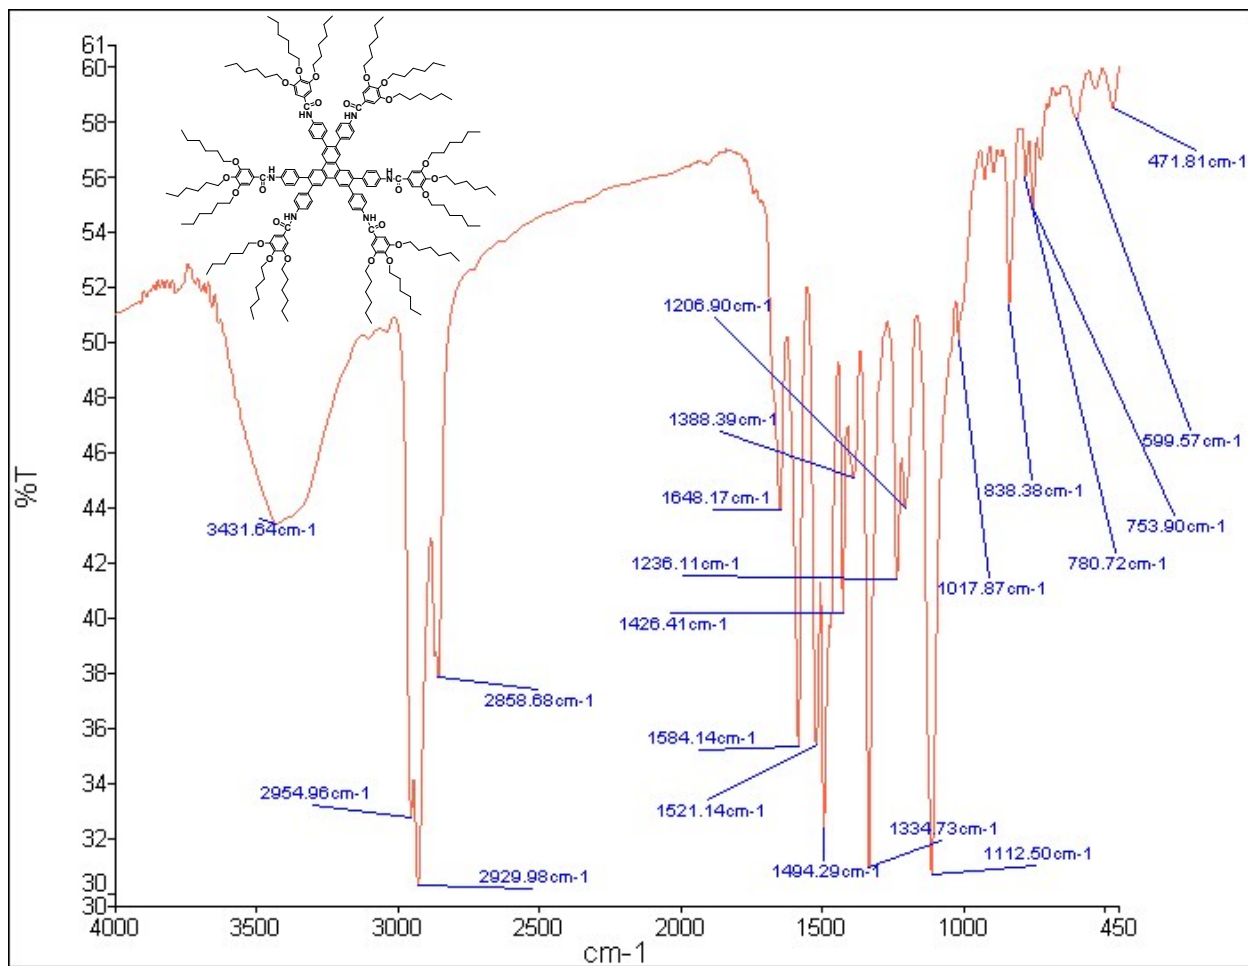

**Table S1** Comparison of present manuscript with other literature reports

| <b>S.No.</b> | <b>Publication</b>                                          | <b>K<sub>SV</sub> (M<sup>-1</sup>)</b>                               | <b>Phase</b>                     | <b>Detection limit in solution phase</b> | <b>Solid state Detection limit</b> |
|--------------|-------------------------------------------------------------|----------------------------------------------------------------------|----------------------------------|------------------------------------------|------------------------------------|
| <b>1</b>     | <b>Present Manuscript</b>                                   | <b>13.33×10<sup>5</sup></b>                                          | <b>Solution, solid and vapor</b> | <b>228.6 ppq</b>                         | <b>22.7 ag.cm<sup>-2</sup></b>     |
| <b>2</b>     | <i>ACS Appl. Mater. Interfaces</i> , 2014, <b>6</b> , 20067 | 1.37×10 <sup>5</sup>                                                 | Solution and solid               | 0.22 ppb                                 | 0.45 pg cm <sup>-2</sup>           |
| <b>3</b>     | <i>Chem. Commun.</i> , 2014, <b>50</b> , 9683               | 8.4×10 <sup>4</sup>                                                  | Solution and vapor               | 2-14 ppb                                 | -                                  |
| <b>4</b>     | <i>Chem. Eur. J.</i> , 2014, <b>20</b> , 2276               | 2.8×10 <sup>3</sup><br>1.55×10 <sup>3</sup><br>1.62 ×10 <sup>3</sup> | Only solution                    | 0.9 ppb,<br>3.63 ppb,<br>2.27 ppb        | -                                  |
| <b>5</b>     | <i>Polym. Chem.</i> , 2014, <b>5</b> , 4521                 | 1.38×10 <sup>3</sup>                                                 | Solution and solid               | 10 μM                                    | 0.5 ng mm <sup>-2</sup>            |
| <b>6</b>     | <i>J. Mater. Chem. C</i> , 2014, <b>2</b> , 515             | 7.4×10 <sup>4</sup>                                                  | Solution and solid               | -                                        | 22.7 ng ml <sup>-1</sup>           |
| <b>7</b>     | <i>Analyst</i> , 2014, <b>139</b> , 2379                    | -                                                                    | Solution and solid               | -                                        | 5.68 ng mm <sup>-2</sup>           |
| <b>8</b>     | <i>Sensors and Actuators B</i> , 2014, <b>199</b> , 148     | 1.04                                                                 | Only solution                    | 423 ppb                                  | -                                  |
| <b>9</b>     | <i>Dyes and Pigments</i> , 2014, <b>101</b> , 122           | 2.37 × 10 <sup>5</sup>                                               | Only solution                    | 1.3×10 <sup>-7</sup> M                   | -                                  |
| <b>10</b>    | <i>Chem. Commun.</i> ,2013, <b>49</b> , 780                 | 1.7 ×10 <sup>4</sup>                                                 | Solution and solid               | -                                        | 0.58 ng mm <sup>-2</sup>           |
